# Supplementary material for: Material State Awareness for Composites Part I: Precursor Damage Analysis Using Ultrasonic Guided Coda Wave Interferometry (CWI)
Source: MDPI journal article supplement (doi:10.3390/ma10121436), 2017-12-16
Supplement: s1 [file s1]

## Supplementary Materials

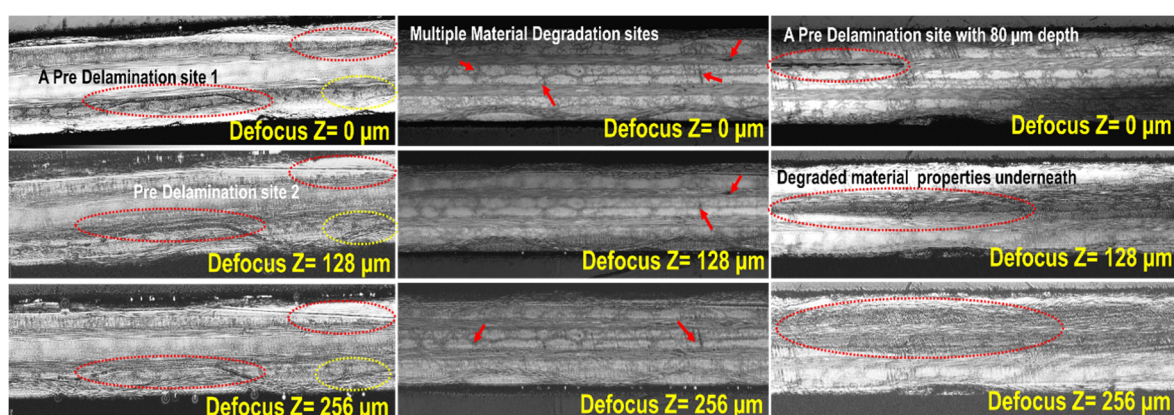

**Figure S1.** Scanning Acoustic Microscopy (SAM) images from the decommissioned specimen S-A after 300,000 cycles of fatigue loading to show the precursor damages have actually initiated in the specimen.
